# Supplementary material for: Immune system and intestinal microbiota determine efficacy of androgen deprivation therapy against prostate cancer
Source: HighWire-hosted journal article supplement (doi:10.1136/jitc-2021-004191), 2022-03-01
Supplement: jitc-2021-004191supp004_data_supplement.pdf [file jitc-2021-004191supp004_data_supplement.pdf]

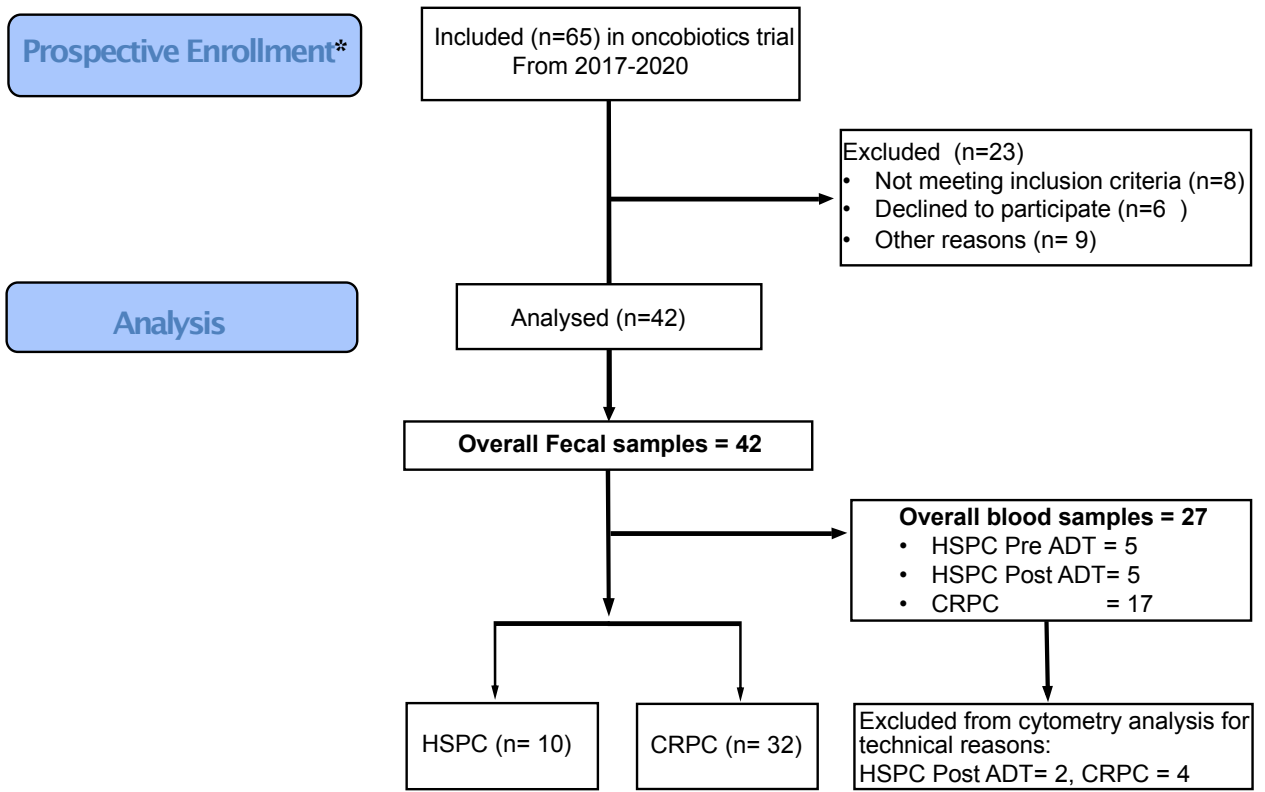

HSPC: hormone-sensitive prostate cancer, CRPC: castration-resistant prostate cancer, ADT: androgen deprivation therapy.

\*Lymphocytes count in the fig. 4A, was extracted from different trials (cf materials and methods): n=70, HSPC pre ADT: 32, post ADT: 17 and CRPC: 21 patients.

**Fig. S3**
