# Supplementary material for: Immune system and intestinal microbiota determine efficacy of androgen deprivation therapy against prostate cancer
Source: HighWire-hosted journal article supplement (doi:10.1136/jitc-2021-004191), 2022-03-01
Supplement: jitc-2021-004191supp005_data_supplement.pdf [file jitc-2021-004191supp005_data_supplement.pdf]

| Patients characteristics                       |          | CRPC        |           | HSPC        |
|------------------------------------------------|----------|-------------|-----------|-------------|
|                                                | <b>n</b> | <b>35</b>   |           | <b>10</b>   |
| Age, mean (Min, Max)                           |          | 71 (58, 91) |           | 70 (57, 79) |
| PS, n (%)                                      | 0        | 14 (40)     |           | 8 (80%)     |
|                                                | 1        | 21 (60)     |           | 2 (20%)     |
| Metastatic (%)                                 |          | 35 (100)    |           | 6 (60%)     |
|                                                | Bone     | 35 (100)    | High risk | 1 (16.6%)   |
|                                                | Visceral | 0           | Low risk  | 5 (83.4%)   |
| Localized (%)                                  |          | 0           |           | 4 (40%)     |
| Number of prior systemic cancer therapy, n (%) | 0        | 19 (54.3)   |           | -           |
|                                                | ≥ 1      | 16 (45.7)   |           | -           |
| Sample collection timing, n (%)                |          |             | V1        | 10          |
|                                                |          |             | V2        | 3           |
|                                                |          |             | V3-V4     | 8           |

HSPC: hormone-sensitive prostate cancer, CRPC: castration-resistant prostate cancer, ADT: androgen deprivation therapy. PS: performance status. V1: Baseline pre ADT, V2: short term post ADT (3 weeks), V3-4: long term post ADT (3-6 months).

**Table. S1**
